# Supplementary material
Source: HighWire-hosted journal article supplement (https://www.ajnr.org/highwire/filestream/52253/field_highwire_adjunct_files/0/2733_table.pdf)
Supplement: 2733_table.pdf [file 2733_table.pdf]

**On-line Table: For each ROI, relative number of other ROIs with which a time course correlation is observed for  $r > 0.3$  and  $r > 0.5$**

| AAL No. | Description                       | $r > 0.3$ | $r > 0.5$ | AAL No. | Description                    | $r > 0.3$ | $r > 0.5$ |
|---------|-----------------------------------|-----------|-----------|---------|--------------------------------|-----------|-----------|
| 44      | Calcarine_R                       | 29.3%     | 9.3%      | 41      | Amygdala_L                     | 16.0%     | 6.7%      |
| 48      | Lingual_R                         | 29.3%     | 10.7%     | 83      | Temporal_Pole_Sup_L            | 16.0%     | 4.0%      |
| 3       | Frontal_Sup_L <sup>b</sup>        | 28.0%     | 5.3%      | 9       | Frontal_Mid_Orb_L <sup>b</sup> | 14.7%     | 8.0%      |
| 8       | Frontal_Mid_R                     | 28.0%     | 1.3%      | 50      | Occipital_Sup_R                | 14.7%     | 2.7%      |
| 31      | Cingulum_Ant_L <sup>b</sup>       | 28.0%     | 14.7%     | 55      | Fusiform_L                     | 14.7%     | 9.3%      |
| 49      | Occipital_Sup_L                   | 28.0%     | 9.3%      | 2       | Precentral_R                   | 13.3%     | 5.3%      |
| 43      | Calcarine_L                       | 26.7%     | 14.7%     | 6       | Frontal_Sup_Orb_R              | 13.3%     | 1.3%      |
| 4       | Frontal_Sup_R <sup>b</sup>        | 24.0%     | 1.3%      | 7       | Frontal_Mid_L                  | 13.3%     | 5.3%      |
| 23      | Frontal_Sup_Medial_L <sup>b</sup> | 24.0%     | 16.0%     | 14      | Frontal_Inf_Tri_R              | 13.3%     | 6.7%      |
| 67      | Precuneus_L <sup>b</sup>          | 24.0%     | 8.0%      | 65      | Angular_L <sup>b</sup>         | 13.3%     | 6.7%      |
| 24      | Frontal_Sup_Medial_R <sup>b</sup> | 22.7%     | 10.7%     | 85      | Temporal_Mid_L                 | 13.3%     | 2.7%      |
| 32      | Cingulum_Ant_R <sup>b</sup>       | 22.7%     | 14.7%     | 89      | Temporal_Inf_L                 | 13.3%     | 4.0%      |
| 45      | Cuneus_L                          | 22.7%     | 13.3%     | 12      | Frontal_Inf_Oper_R             | 12.0%     | 2.7%      |
| 46      | Cuneus_R                          | 22.7%     | 13.3%     | 13      | Frontal_Inf_Tri_L              | 12.0%     | 8.0%      |
| 51      | Occipital_Mid_L                   | 22.7%     | 9.3%      | 17      | Rolandic_Oper_L                | 12.0%     | 5.3%      |
| 68      | Precuneus_R <sup>b</sup>          | 22.7%     | 6.7%      | 20      | Supp_Motor_Area_R              | 12.0%     | 5.3%      |
| 30      | Insula_R                          | 21.3%     | 10.7%     | 59      | Parietal_Sup_L                 | 12.0%     | 2.7%      |
| 36      | Cingulum_Post_R <sup>b</sup>      | 21.3%     | 12.0%     | 1       | Precentral_L                   | 10.7%     | 6.7%      |
| 47      | Lingual_L                         | 21.3%     | 8.0%      | 5       | Frontal_Sup_Orb_L              | 10.7%     | 2.7%      |
| 15      | Frontal_Inf_Orb_L                 | 20.0%     | 10.7%     | 11      | Frontal_Inf_Oper_L             | 10.7%     | 4.0%      |
| 35      | Cingulum_Post_L <sup>b</sup>      | 20.0%     | 10.7%     | 19      | Supp_Motor_Area_L              | 10.7%     | 2.7%      |
| 38      | Hippocampus_R                     | 20.0%     | 12.0%     | 21      | Olfactory_L                    | 10.7%     | 4.0%      |
| 52      | Occipital_Mid_R                   | 20.0%     | 6.7%      | 25      | Frontal_Mid_Orb_L              | 10.7%     | 2.7%      |
| 84      | Temporal_Pole_Sup_R               | 20.0%     | 6.7%      | 42      | Amygdala_R                     | 10.7%     | 4.0%      |
| 86      | Temporal_Mid_R                    | 20.0%     | 8.0%      | 57      | Postcentral_L                  | 10.7%     | 5.3%      |
| 26      | Frontal_Mid_Orb_R                 | 18.7%     | 2.7%      | 79      | Heschl_L                       | 10.7%     | 6.7%      |
| 29      | Insula_L                          | 18.7%     | 9.3%      | 80      | Heschl_R                       | 10.7%     | 5.3%      |
| 56      | Fusiform_R                        | 18.7%     | 10.7%     | 58      | Postcentral_R                  | 9.3%      | 1.3%      |
| 81      | Temporal_Sup_L                    | 18.7%     | 6.7%      | 61      | Parietal_Inf_L                 | 9.3%      | 5.3%      |
| 82      | Temporal_Sup_R                    | 18.7%     | 10.7%     | 63      | Supramarginal_L                | 9.3%      | 1.3%      |
| 10      | Frontal_Mid_Orb_R <sup>b</sup>    | 17.3%     | 6.7%      | 18      | Rolandic_Oper_R                | 8.0%      | 4.0%      |
| 16      | Frontal_Inf_Orb_R                 | 17.3%     | 10.7%     | 22      | Olfactory_R                    | 8.0%      | 0.0%      |
| 33      | Cingulum_Mid_L                    | 17.3%     | 8.0%      | 62      | Parietal_Inf_R                 | 8.0%      | 1.3%      |
| 37      | Hippocampus_L                     | 17.3%     | 9.3%      | 66      | Angular_R <sup>b</sup>         | 8.0%      | 1.3%      |
| 40      | Parahippocampal_R                 | 17.3%     | 6.7%      | 60      | Parietal_Sup_R                 | 6.7%      | 2.7%      |
| 90      | Temporal_Inf_R                    | 17.3%     | 8.0%      | 64      | Supramarginal_R                | 5.3%      | 1.3%      |
| 34      | Cingulum_Mid_R                    | 16.0%     | 8.0%      | 69      | Paracentral_lobule_L           | 5.3%      | 2.7%      |
| 39      | Parahippocampal_L                 | 16.0%     | 6.7%      | 70      | Paracentral_lobule_R           | 2.7%      | 1.3%      |

**Note:**—R indicates right; L, left; Mid, middle; Sup, superior; Ant, anterior; Post, posterior; Inf, inferior; Orb, orbital; Tri, triangular; Oper, opercular; Supp, supplementary.  
<sup>a</sup> For each ROI, the relative number of other ROIs with which a significant time course correlation is observed, calculated for time course correlation  $r \geq 0.3$  and  $r \geq 0.5$ .  
<sup>b</sup> Regions involved in the DMN.
